# Supplementary material for: Evaluating the Use of rCBV as a Tumor Grade and Treatment Response Classifier Across NCI Quantitative Imaging Network Sites: Part II of the DSC-MRI Digital Reference Object (DRO) Challenge
Source: PubMed Central journal article supplement — Tomography. 2020 Jun;6(2):203–8. doi: 10.18383/j.tom.2020.00012 (PMC7289259; doi:10.18383/j.tom.2020.00012), 2020-06
Supplement: tom.2020.00012.sup.01.pdf [file tom.2020.00012.sup.01.pdf]

| Site Number:      | Imaging Protocol (IP): |                |         |       |                   |                     |                    |     |                           | Processing Method (PM):                                                                                           |                       | ID Tag for Analysis:             |                                                                                   |  |
|-------------------|------------------------|----------------|---------|-------|-------------------|---------------------|--------------------|-----|---------------------------|-------------------------------------------------------------------------------------------------------------------|-----------------------|----------------------------------|-----------------------------------------------------------------------------------|--|
|                   | Field Strength         | Scan Protocol: |         |       | Dose Protocol:    |                     |                    | CA  | site IP w/<br>constant PP | constant IP w/<br>site PP                                                                                         | site IP w/<br>site PP |                                  |                                                                                   |  |
|                   |                        | TR (ms)        | TE (ms) | Flip  | Preload (mmol/kg) | Injection (mmol/kg) | Time Between (min) |     |                           |                                                                                                                   |                       |                                  |                                                                                   |  |
| 01                | 01:                    | 3.0T           | 1500    | 30    | 60                | 0.05                | 0.10               | 3   | gadobenate                | 01: In-house processing                                                                                           | S01_IP01              | S01_PM01                         | S01_IP01_PM01                                                                     |  |
|                   | 02:                    | 1.5T           | 1500    | 30    | 60                | 0.05                | 0.10               | 3   | gadobenate                |                                                                                                                   | S01_IP02              |                                  | S01_IP02_PM01                                                                     |  |
| 02                | 01:                    | 3.0T           | 1600    | 30    | 60                | 0                   | 0.1                | n/a | gadobenate                | 01: IB Neuro                                                                                                      | S02_IP01              | S02_PM01                         | S02_IP01_PM01                                                                     |  |
| 03                | 01:                    | 3.0T           | 1500    | 31    | 90                | 0.05                | 0.15               | 6.5 | gadoterate                | 01: 3DSlicer<br>02: nordicICE<br>03: PGUI                                                                         | S03_IP01              | S03_PM01                         | S03_IP01_PM01                                                                     |  |
|                   | 02:                    | 3.0T           | 1500    | 31    | 90                | 0.1                 | 0.1                | 6.5 | gadoterate                |                                                                                                                   | S03_IP02              | S03_PM02<br>S03_PM03             | S03_IP01_PM02<br>S03_IP01_PM03<br>S03_IP02_PM01<br>S03_IP02_PM02<br>S03_IP02_PM03 |  |
| 04                | 01:                    | 3.0T           | 1500    | 30    | 80                | 0.10                | 0.10               | 5   | gadobutrol                | 01: IB Neuro                                                                                                      | S04_IP01              | S04_PM01                         | S04_IP01_PM01                                                                     |  |
|                   | 02:                    | 3.0T           | 1500    | 2, 35 | 80                | 0                   | 0.10               | n/a | gadobutrol                |                                                                                                                   | S04_IP02              |                                  | n/a                                                                               |  |
|                   | 03:                    | 1.5T           | 1500    | 30    | 72                | 0.10                | 0.10               | 5   | gadobutrol                |                                                                                                                   | S04_IP03              |                                  | S04_IP03_PM01                                                                     |  |
|                   | 04:                    | 1.5T           | 1500    | 2, 35 | 72                | 0                   | 0.10               | n/a | gadobutrol                |                                                                                                                   | S04_IP04              |                                  | n/a                                                                               |  |
| 05                | 01:                    | 3.0T           | 1300    | 30    | 60                | 0.025               | 0.10               | 5   | gadobutrol                | 01: IB Neuro (Integration limits 1)                                                                               | S05_IP01              | S05_PM01                         | S05_IP01_PM01                                                                     |  |
|                   | 02:                    | 1.5T           | 1300    | 30    | 60                | 0.025               | 0.10               | 5   | gadobutrol                | 02: IB Neuro (Integration limits 2)                                                                               | S05_IP02              | S05_PM02                         | S05_IP01_PM02<br>S05_IP02_PM01<br>S05_IP02_PM02                                   |  |
| 06                | 01:                    | 3.0T           | 1500    | 30    | 75                | 0.10                | 0.10               | 5   | gadoteridol               | 01: PGUI (rCBV definition 1)<br>02: PGUI (rCBV definition 2)                                                      | S06_IP01              | S06_PM01<br>S06_PM02             | S06_IP01_PM01<br>S06_IP01_PM01                                                    |  |
| 07                | 01:                    | 3.0T           | 1500    | 30    | 65                | 0.025               | 0.075              | 6   | gadobenate                | 01: In-house processing                                                                                           | S07_IP01              | S07_PM01                         | S07_IP01_PM01                                                                     |  |
| 08                | 01:                    | 3.0T           | 1500    | 21    | 60                | 0.10                | 0.05               | 6   | gadobenate                | 01: In-house processing                                                                                           | S08_IP01              | S08_PM01                         | S08_IP01_PM01                                                                     |  |
| 09                | 01:                    | 3.0T           | 1500    | 18    | 60                | 0.05                | 0.05               | 6   | gadobenate                | 01: IB Neuro                                                                                                      | S09_IP01              | S09_PM01                         | S09_IP01_PM01                                                                     |  |
| 10                | 01:                    | 3.0T           | 1900    | 36    | 90                | 0                   | 0.10               | n/a | gadoterate                | 01: In-house processing                                                                                           | S10_IP01              | S10_PM01                         | S10_IP01_PM01                                                                     |  |
|                   | 02:                    | 3.0T           | 1900    | 36    | 90                | 0.10                | 0.10               | 5   | gadoterate                |                                                                                                                   | S10_IP02              |                                  | S10_IP02_PM01                                                                     |  |
| 11                | 01:                    | 3.0T           | 2560    | 71    | 90                | 0.025               | 0.1                | 2   | gadopentetate             | n/a                                                                                                               | S11_IP01              | n/a                              | n/a                                                                               |  |
| 12                | 01:                    | 3.0T           | 1757    | 30    | 90                | 0.033               | 0.067              | 8   | gadobutrol                | 01: Philips ISP (rCBV definition 1)<br>02: Philips ISP (rCBV definition 2)<br>03: Philips ISP (rCBV definition 3) | S12_IP01              | S12_PM01<br>S12_PM02<br>S12_PM03 | S12_IP01_PM01<br>S12_IP01_PM02<br>S12_IP01_PM03                                   |  |
| Standard Protocol | 01:                    | 3.0T           | 1500    | 30    | 60                | 0.10                | 0.10               | 5   | gadopentetate             | n/a                                                                                                               | SIP                   | n/a                              | n/a                                                                               |  |

|                |           |  |  |  |  |  |  |  |  |  |           |           |           |
|----------------|-----------|--|--|--|--|--|--|--|--|--|-----------|-----------|-----------|
| <b>Total*:</b> | <b>12</b> |  |  |  |  |  |  |  |  |  | <b>19</b> | <b>17</b> | <b>25</b> |
|----------------|-----------|--|--|--|--|--|--|--|--|--|-----------|-----------|-----------|

\*excludes the standard protocol
