# Supplementary material for: Evaluating the Use of rCBV as a Tumor Grade and Treatment Response Classifier Across NCI Quantitative Imaging Network Sites: Part II of the DSC-MRI Digital Reference Object (DRO) Challenge
Source: PubMed Central journal article supplement — Tomography. 2020 Jun;6(2):203–8. doi: 10.18383/j.tom.2020.00012 (PMC7289259; doi:10.18383/j.tom.2020.00012), 2020-06
Supplement: tom.2020.00012.sup.02.pdf [file tom.2020.00012.sup.02.pdf]

| Site Number: | Software:                           | CBV definition:                                                 | Normalized to NAWM? | Integration Limits:                                | Leakage Correction Method:    | Comments:                                                                                  |
|--------------|-------------------------------------|-----------------------------------------------------------------|---------------------|----------------------------------------------------|-------------------------------|--------------------------------------------------------------------------------------------|
| 01           | 01: In-house processing             | AUC of the $\Delta R_2^*$ time course                           | No                  | Time points: 2 to 64 (93 sec)                      | BSW leakage correction method | Manual inspection of pre- and post- contrast points for rCBV integration                   |
| 02           | 01: IB Neuro                        | AUC of the $\Delta R_2^*$ time course                           | Yes                 | automatically detected (default option)            | BSW leakage correction method | Default IB Neuro settings for rCBV                                                         |
| 03           | 01: 3DSlicer                        | AUC of the $\Delta R_2^*$ time course                           | No                  | 118 seconds                                        | BSW leakage correction method | No thresholding                                                                            |
|              | 02: nordicICE                       | AUC of the $\Delta R_2^*$ time course                           | Yes                 | Time points: 2 to 121 (178.5 sec)                  | BSW leakage correction method |                                                                                            |
|              | 03: PGUI                            | AUC of the $\Delta R_2^*$ time course                           | No                  | Time points: 2 to 121 (178.5 sec)                  | BSW leakage correction method | No thresholding, but smoothing applied                                                     |
| 04           | 01: IB Neuro                        | AUC of the $\Delta R_2^*$ time course                           | Yes                 | automatically detected (default option)            | BSW leakage correction method |                                                                                            |
| 05           | 01: IB Neuro (Integration limits 1) | AUC of the $\Delta R_2^*$ time course                           | Yes                 | automatically detected (default option)            | BSW leakage correction method |                                                                                            |
|              | 02: IB Neuro (Integration limits 2) | AUC of the $\Delta R_2^*$ time course                           | Yes                 | 180 seconds (all time points)                      | BSW leakage correction method |                                                                                            |
| 06           | 01: PGUI (rCBV definition 1)        | Deconvolution of the residue function (SVD)                     | No                  | Time points: 5 to 121 (174 sec)                    | BSW leakage correction method |                                                                                            |
|              | 02: PGUI (rCBV definition 2)        | Deconvolution of the residue function (oSVD)                    | No                  | Time points: 5 to 121 (174 sec)                    | BSW leakage correction method |                                                                                            |
| 07           | 01: In-house processing             | AUC of the $\Delta R_2^*$ time course                           | No                  | automatically detected (default option)            | BSW leakage correction method |                                                                                            |
| 08           | 01: In-house processing             | AUC of the $\Delta R_2^*$ time course                           | Yes                 | 90 sec                                             | BSW leakage correction method |                                                                                            |
| 09           | 01: IB Neuro                        | AUC of the $\Delta R_2^*$ time course                           | Yes                 | automatically detected (default option)            | BSW leakage correction method | Did not use the entire NAWM ROI - instead used a 6mm x 6mm (-225 pixels) ROI               |
| 10           | 01: In-house processing             | AUC of the $\Delta R_2^*$ time course                           | No                  | 171 sec                                            | BSW leakage correction method | $\Delta R_2^*$ maps were smoothed with a 5x5 Gaussian window that had a FWHM value of 3 mm |
| 11           | n/a                                 |                                                                 |                     |                                                    |                               |                                                                                            |
| 12           | 01: Philips ISP (rCBV definition 1) | AUC of the $\Delta R_2^*$ time course                           | No                  | Based on the characteristics of signal time curves | No leakage correction method  |                                                                                            |
|              | 02: Philips ISP (rCBV definition 2) | AUC of the $\Delta R_2^*$ time course fitted to a gamma-variate | No                  | Based on the characteristics of signal time curves | No leakage correction method  |                                                                                            |
|              | 03: Philips ISP (rCBV definition 3) | AUC of the $\Delta R_2^*$ time course                           | No                  | 180 sec                                            | BSW leakage correction method |                                                                                            |
